# Supplementary material for: Astaxanthin Improves Human Sperm Capacitation by Inducing Lyn Displacement and Activation
Source: Mar Drugs. 2015 Aug 25;13(9):5533–51. doi: 10.3390/md13095533 (PMC4584338; doi:10.3390/md13095533)
Supplement: Supplementary File 1 [file marinedrugs-13-05533-s001.doc]

**Supplementary Materials**

**
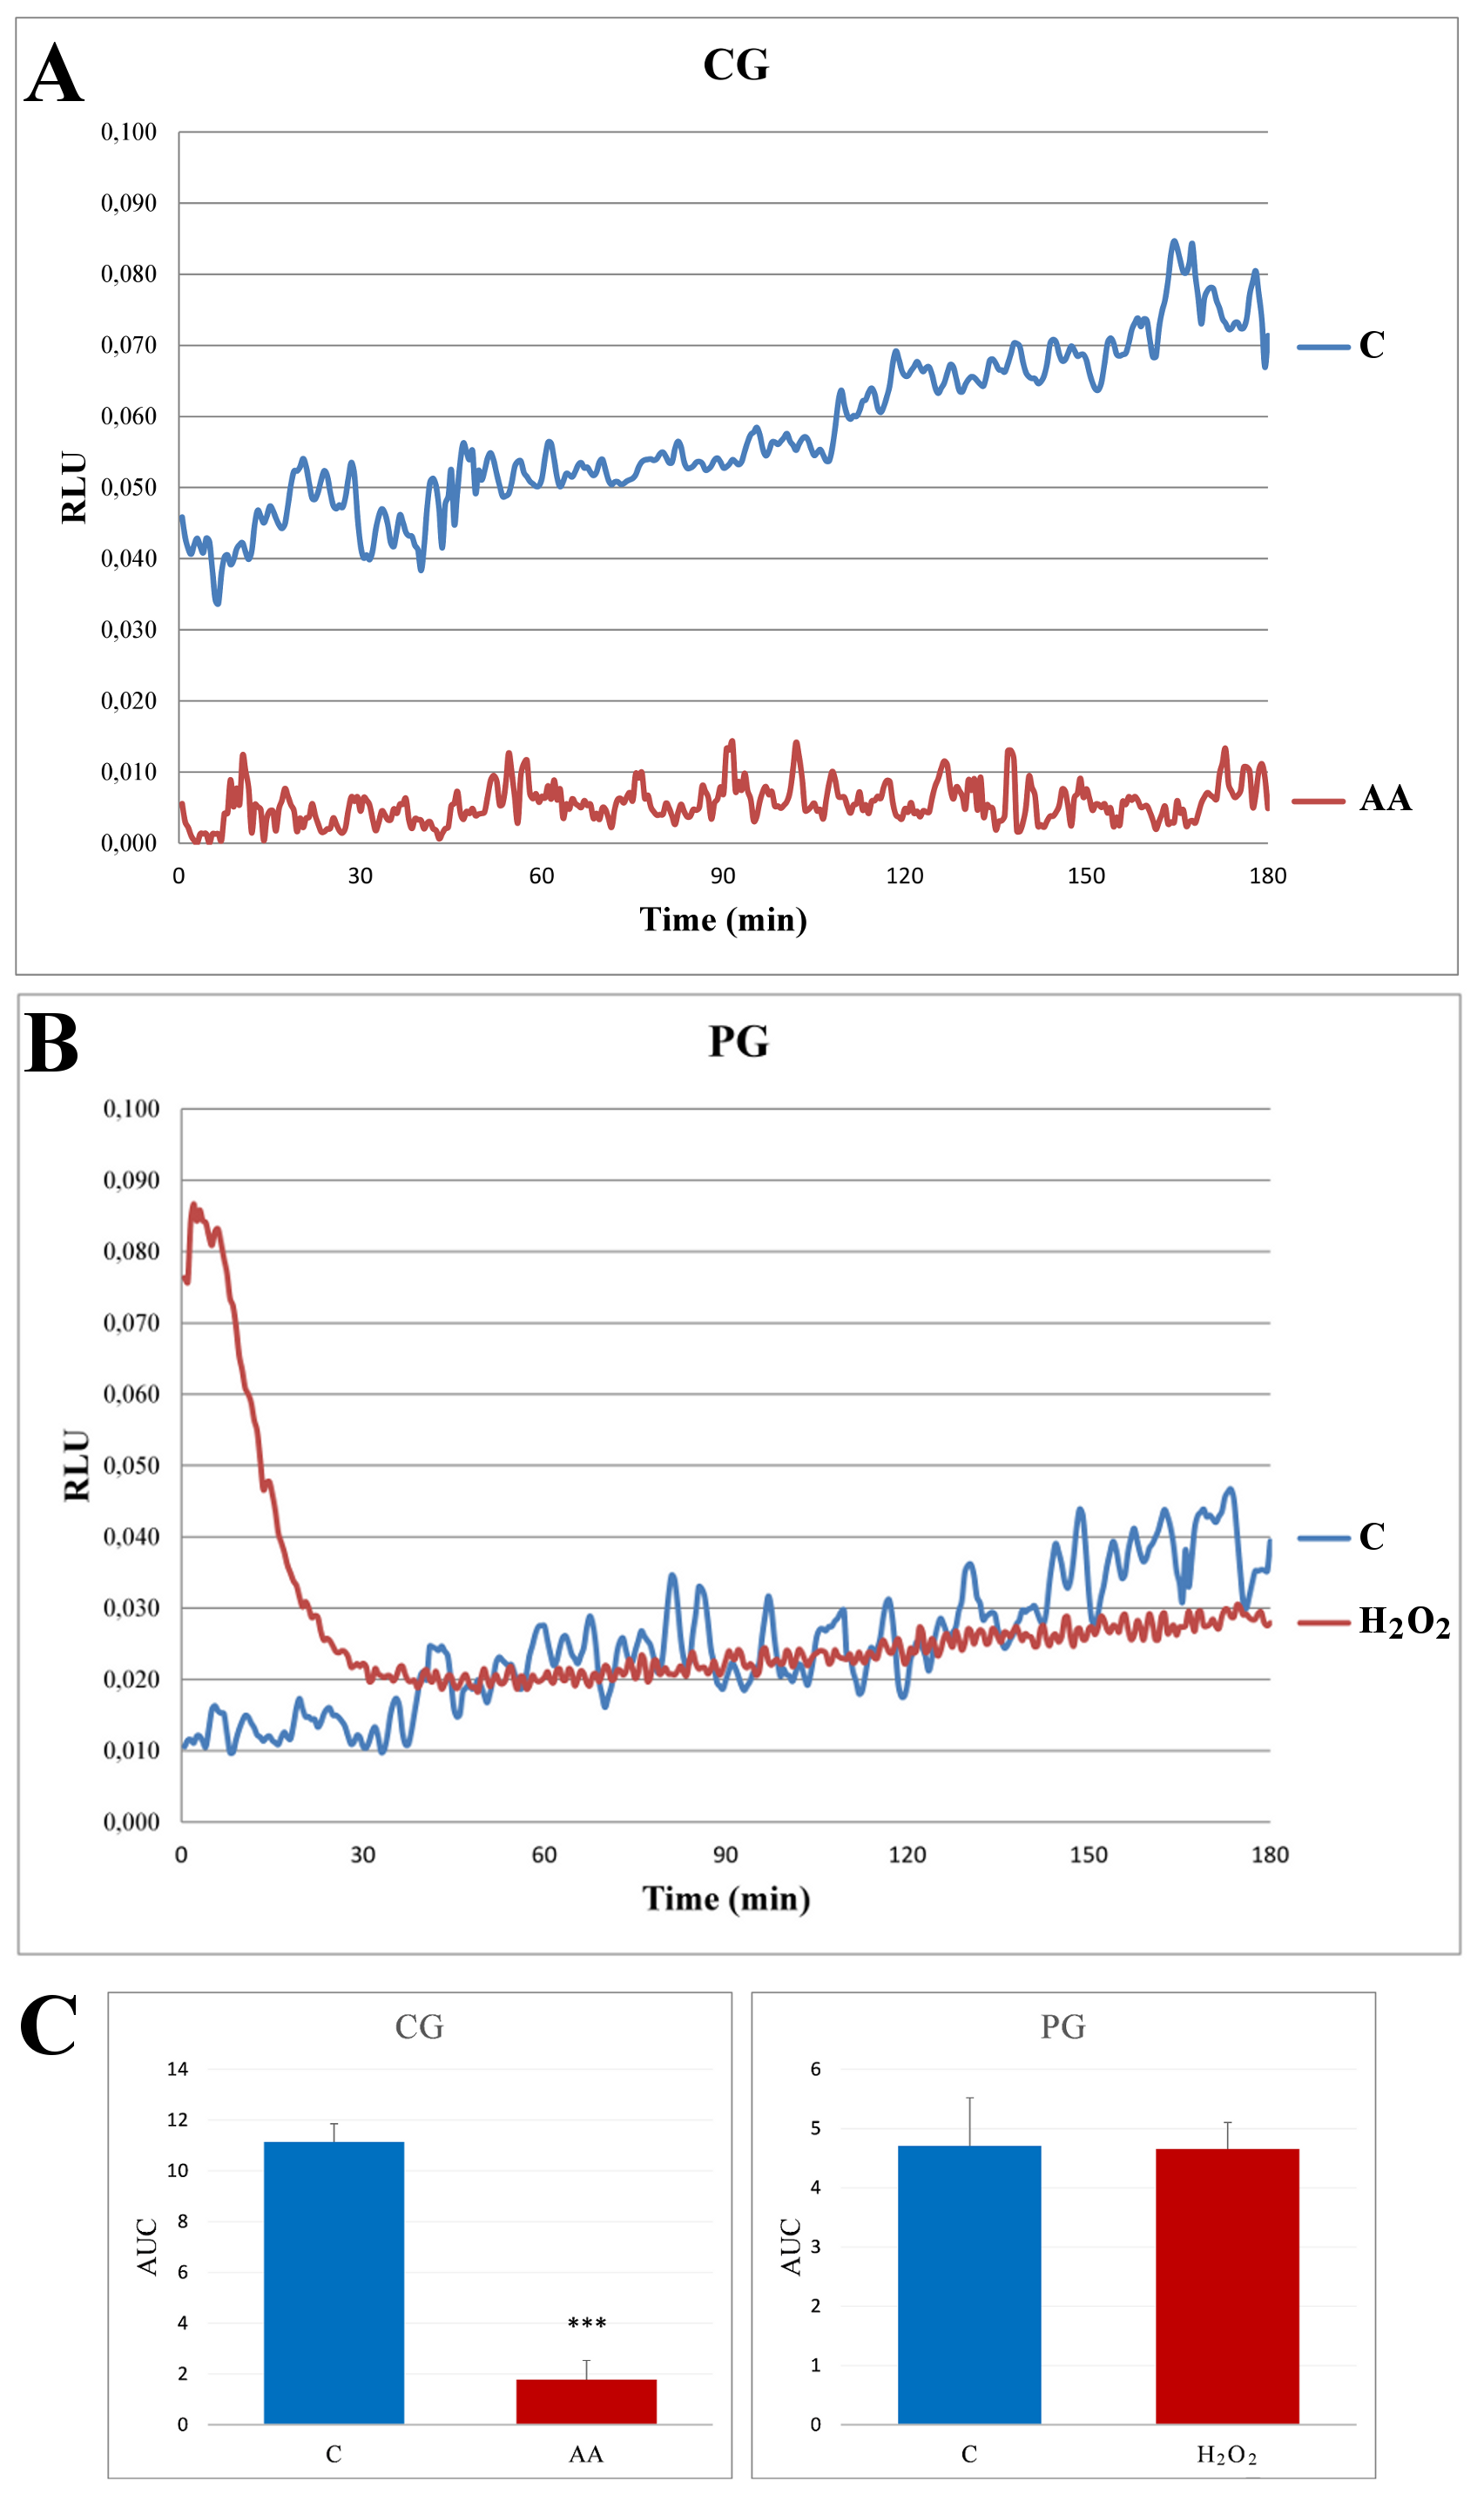
**

**Figure S1.** ROS generation curves of sperm samples and effects of Ascorbic Acid (AA) or H2O2. Sperm from 3 volunteers for each experiment was collected to form a pool with a sufficient number of cells. Sperm was incubated for up to 180 min in capacitating conditions in the absence (C) or presence of AA (1 mM) for cells from CG,
or H2O2 (0.6 M) for PG . Luminol chemiluminescence was monitored during sperm capacitation. Results are expressed as moving averages of Relative Luminescence Units (RLU)/30 s for 2 × 106 cells. The figure is representative of 3 separate experiments, conducted on samples belonging to the control group (CG, panel **A**) or the patient group (PG, panel **B**). Detection was carried out in triplicate. Graphs in panel **C** show AUC of the RLU data in both groups. *** *p* < 0.001 *vs.* C; Student’s *t* test.


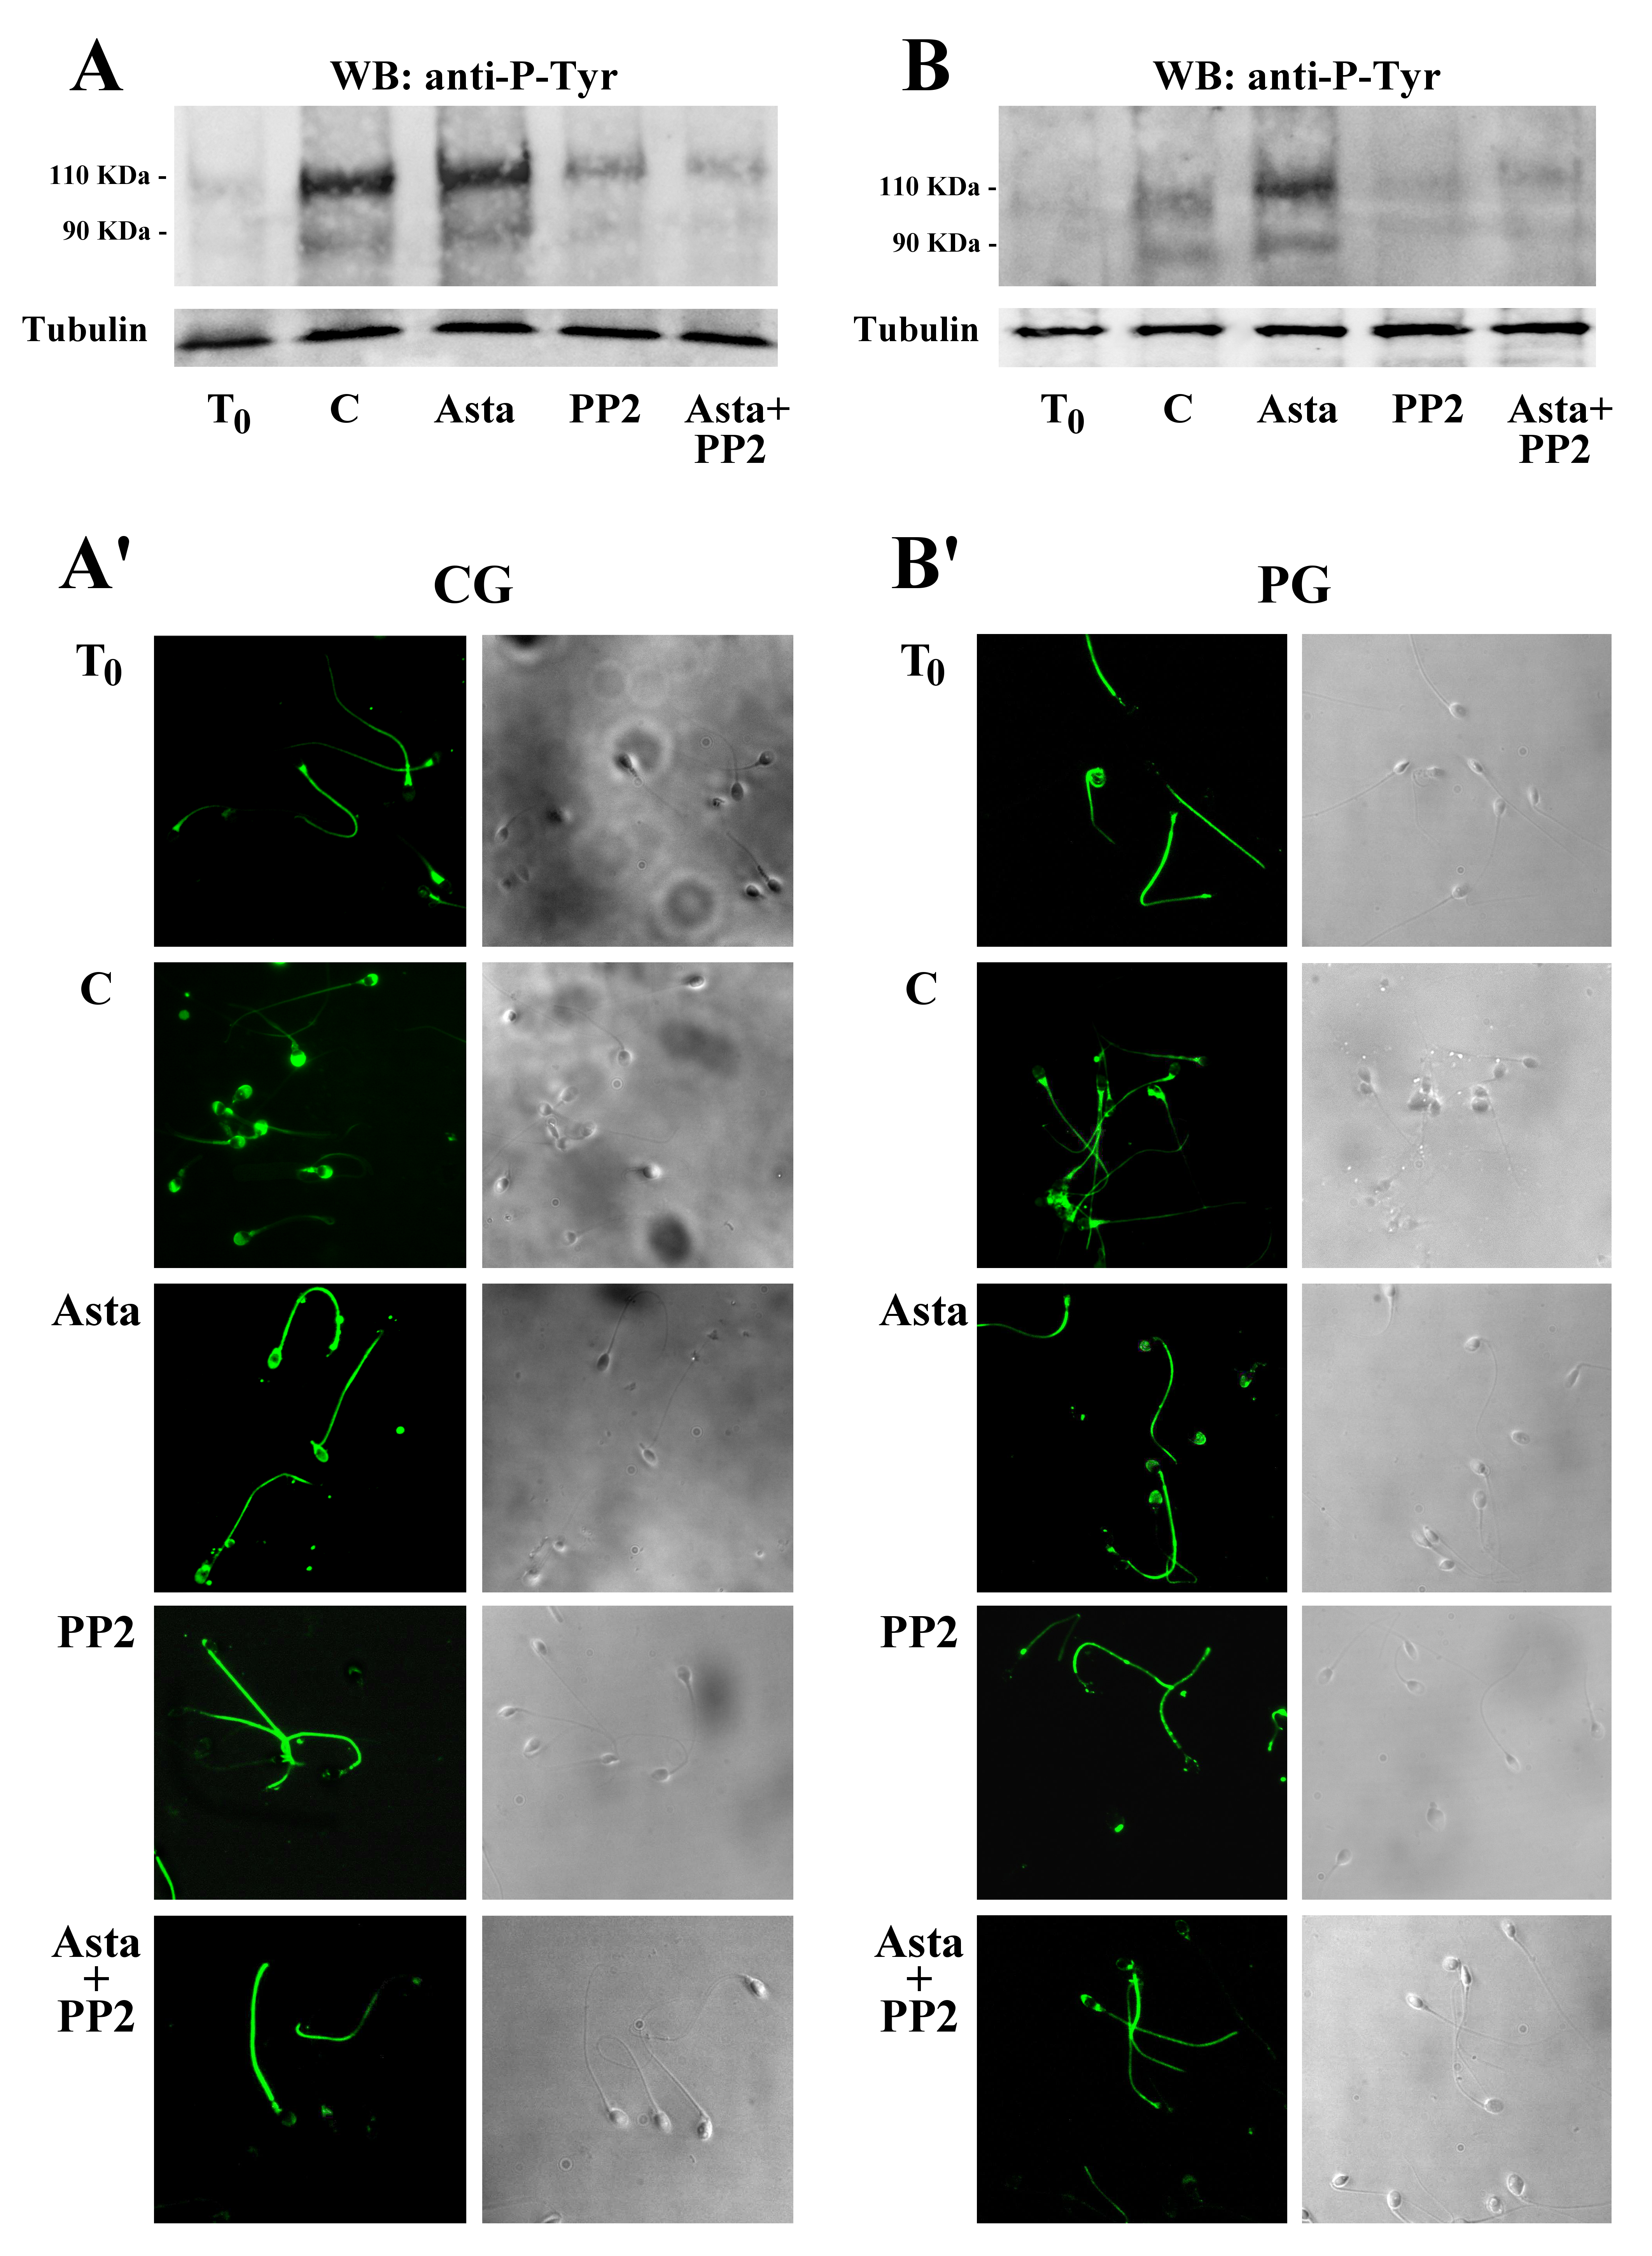


**Figure S2.** Panels **A** and **B**: Western blotting analysis of Tyr-P proteins in total cell lysates from CG (panel **A**) or PG (panel **B**) sperm was carried out in samples T0, C, Asta, PP2 and Asta + PP2. Cells (1 × 106) incubated in the different conditions were treated with 2 mm (final concentration) of 3-[(3-cholamidopropyl) dimethylammonio]-1-propanesulphonate hydrate (CHAPS), solubilized by adding sodium dodecyl sulphate (SDS) and
β-mercaptoethanol (2% final concentration), boiled at 100 °C for 5 min and subjected to SDS-PAGE (10%). Proteins were electro-transferred to a nitrocellulose membrane and immuno-revealed with anti-P-Tyr antibody, or anti-Tubulin as loading control. Panels **A’** and **B’**: sperm from control group (CG, panel **A’**) and patient group (PG, panel **B’**),
at T0 or incubated in capacitating conditions for 180 min in absence (C) or presence
of Asta (2 M), PP2 (6 M) or Asta + PP2, were analysed for anti-Tyr-P labelling
by immunofluorescence cytochemistry as described in Methods. Fluorescent and corresponding phase-contrast images for each conditions are shown. The figure is representative of 11 separate experiments conducted in triplicate.

**Table S1.** Sperm motility and hyperactivation were analysed using a computer-assisted sperm analyzer (CASA). For each sample, the following parameters were evaluated: the percentage of motile spermatozoa and VCL (curvilinear velocity), VAP (average path velocity), VSL (straight-line velocity) and ALH (amplitude of lateral head displacement) to determine the percentage of hyper-activated (HA) cells. Only cells with VCL ≥ 150 µm/s, LIN (VSL/VCL) ≤ 50%, and ALH ≥ 7 µm [36] were considered HA. All measurements were performed at 37 °C. A minimum of 100 cells and 5 fields were analysed for each aliquot. Values are expressed as means ± SD. † *p* < 0.05 comparison between various samples *vs.* C as reference; Student’s *t*-test for paired data. * *p* < 0.05; ** *p* < 0.01;
*** *p* < 0.001 comparison C *vs.* T0; Student’s *t-*test for paired data.

| **Groups** | **Parameter** | **T0** | **C** | **Asta** | **PP2** | **Asta + PP2** |
| --- | --- | --- | --- | --- | --- | --- |
| **C** | **Motility** | 84 ± 4 | 74 ± 5 * | 76 ± 6 | 72 ± 6 | 75 ± 4 |
| **HA** | 6 ± 3 | 26 ± 4 *** | 24 ± 5 | 23 ± 3 | 24 ± 3 |
| **PG** | **Motility** | 83 ± 5 | 71 ± 4 ** | 72 ± 3 | 70 ± 3 | 72 ± 5 |
| **HA** | 5 ± 2 | 24 ± 4 *** | 27 ± 4 † | 25 ± 4 | 24 ± 6 |

**Table S2.** Sperm cells from control group (CG) or patient group (PG) at T0, or incubated for 180 min in capacitating conditions in the absence (C) in the presence of AA (1 mM) for CG, or H2O2 (0.25 M) for PG were analysed for Tyr-P pattern, acrosome-reacted cells (ARC) and viability (non-viable cells, NVC) by immunofluorescence cytochemistry (see Methods). Number of cells expressed as % of total number of cells showing Tyr-P in
any part of cell body or in head, were detected and reported as Tyr-P cells and Tyr-P head, respectively. Percentages of cells undergoing acrosome reaction (ARC) or NVC were
also reported. Values are expressed as means ± SD. † *p* < 0.05 comparison between AA
or H2O2 *vs.* C as reference; Student’s *t-*test for paired data. ** *p* < 0.01 comparison C *vs.* T0; Student’s *t-*test for paired data.

| **Group** | **Parameter** | **T0** | **C** | **AA** | **H2O2** |
| --- | --- | --- | --- | --- | --- |
| **CG** | **Tyr-P cells** | 92 ± 3 | 94 ± 4 | 74 ± 5 † | **-** |
| **Tyr-P head** | 12 ± 3 | 67 ± 6 ** | 34 ± 7 † | **-** |
| **ARC** | 17 ± 4 | 60 ± 6 ** | 27 ± 4 † | **-** |
| **NVC** | 6 ± 2 | 7 ± 3 | 15 ± 3 | **-** |
| **PG** | **Tyr-P cells** | 46 ± 5 | 56 ± 7 | **-** | 51 ± 6 |
| **Tyr-P head** | 7 ± 5 | 21 ± 3 | **-** | 9 ± 2 † |
| **ARC** | 9 ± 3 | 16 ± 4 | **-** | 10 ± 2 |
| **NVC** | 14 ± 4 | 22 ± 3 ** | **-** | 33 ± 4 |

© 2015 by the authors; licensee MDPI, Basel, Switzerland. This article is an open access article distributed under the terms and conditions of the Creative Commons Attribution license (http://creativecommons.org/licenses/by/4.0/).
